# Supplementary material for: Sea Surface Temperature over the Bay of Bengal: A key driver for South Asian Summer Monsoon rainfall during past 31 kiloyears
Source: Copernicus journal article supplement (doi:10.5194/egusphere-2024-1566), 2024-06-25
Supplement: Supplementary file 1 [file egusphere-2024-1566-supplement.pdf]

1 **Supplementary File**

2 **Sea Surface Temperature over the Bay of Bengal: A key**  
3 **driver for South Asian Summer Monsoon rainfall during past**  
4 **31 kiloyears**

5 Thamizharasan Sakthivel<sup>1,2</sup>, Prosenjit Ghosh<sup>1,2</sup>\*, Ravi Bhushan<sup>3</sup>, Harsh Raj<sup>3</sup>, Ankur J Dabhi<sup>3</sup>,  
6 Ajay Shivam<sup>3</sup>, Senthilnathan D<sup>4</sup>

7 <sup>1</sup>Centre for Earth Sciences, Indian Institute of Science, Bangalore, India 560012.

8 <sup>2</sup>Divecha Centre for Climate Change, Indian Institute of Science, Bangalore, India 560012.

9 <sup>3</sup>Geosciences Division, Physical Research Laboratory, Ahmedabad, India 380009.

10 <sup>4</sup>Department of Earth Sciences, Pondicherry University, Puducherry, India 605014.

11 *Correspondence to:* Prosenjit Ghosh (pghosh@iisc.ac.in)

12  
13 **This PDF file includes:**

14 Supplementary text

15 Fig. S1 to S6

16 Title for supplementary table

17  
18 **Other Supplementary Materials for this manuscript include the following:**

19 Date S1 to S5

20

21

22

23

24

25

26

27 **Supplementary text:**

28 **Error propagation for  $\Delta$ SSS estimates:**

29 The relationship between SSS and  $\delta^{18}\text{O}_{\text{sw}}$  is expressed using Rayleigh steady model as follows:

30 
$$\frac{\text{SSS}}{S_0} = \left[ \frac{\delta^{18}\text{O}_{\text{sw}} \times (1-\beta)}{(\beta \times \delta^{18}\text{O}_{\text{freshwater}}) - \varepsilon_{\text{vap/liq}}} \right] + 1 \rightarrow (1)$$

31

32 For error propagation, we only considered the error associated with  $\delta^{18}\text{O}_{\text{sw}}$  and didn't take into  
33 account the errors associated with other variables such as  $\beta$ ,  $\varepsilon_{\text{vap/liq}}$ , and  $\delta^{18}\text{O}_{\text{freshwater}}$ .

34 To simplify the mathematical error propagation process, we assigned letter to each variable,  
35 where

36  $A = 1 - \beta \rightarrow (2)$

37  $B = \varepsilon_{\text{vap/liq}} \rightarrow (3)$

38  $C = \beta \times \delta^{18}\text{O}_{\text{freshwater}} \rightarrow (4)$

39  $D = \delta^{18}\text{O}_{\text{sw}} \rightarrow (5)$

40  $E = S_0 \rightarrow (6)$

41 The substitution of (2, 3, 4, 5, and 6) into equation (1) becomes:

42 
$$\text{SSS} = \left[ \frac{D \times A \times E}{C - B} \right] + E \rightarrow (7)$$

43 The formula for error propagation is:

44 
$$\delta\text{SSS} = \sqrt{\left(\frac{\partial\text{SSS}}{\partial A} \times \delta A\right)^2 + \left(\frac{\partial\text{SSS}}{\partial B} \times \delta B\right)^2 + \left(\frac{\partial\text{SSS}}{\partial C} \times \delta C\right)^2 + \left(\frac{\partial\text{SSS}}{\partial D} \times \delta D\right)^2 + \left(\frac{\partial\text{SSS}}{\partial E} \times \delta E\right)^2} \rightarrow$$

45 (8)

46 Given that A, B, C, and E are constant, their respective error terms are ( $\delta A$ ,  $\delta B$ ,  $\delta C$ , and  $\delta E$ ) zero,  
47 hence:

$$48 \quad \delta SSS = \sqrt{\left(\frac{\partial SSS}{\partial D} \times \delta D\right)^2} \rightarrow (9)$$

49 The partial derivative of SSS with respect to the D variable is:

$$50 \quad \frac{\partial SSS}{\partial D} = \frac{AE}{(C-B)} \rightarrow (10)$$

$$51 \quad \delta SSS = \sqrt{\left(\frac{AE}{(C-E)} \times \delta D\right)^2} = \left|\frac{AE}{(C-E)}\right| \times \delta D \rightarrow (10)$$

52

53 **Supplementary Figures:**

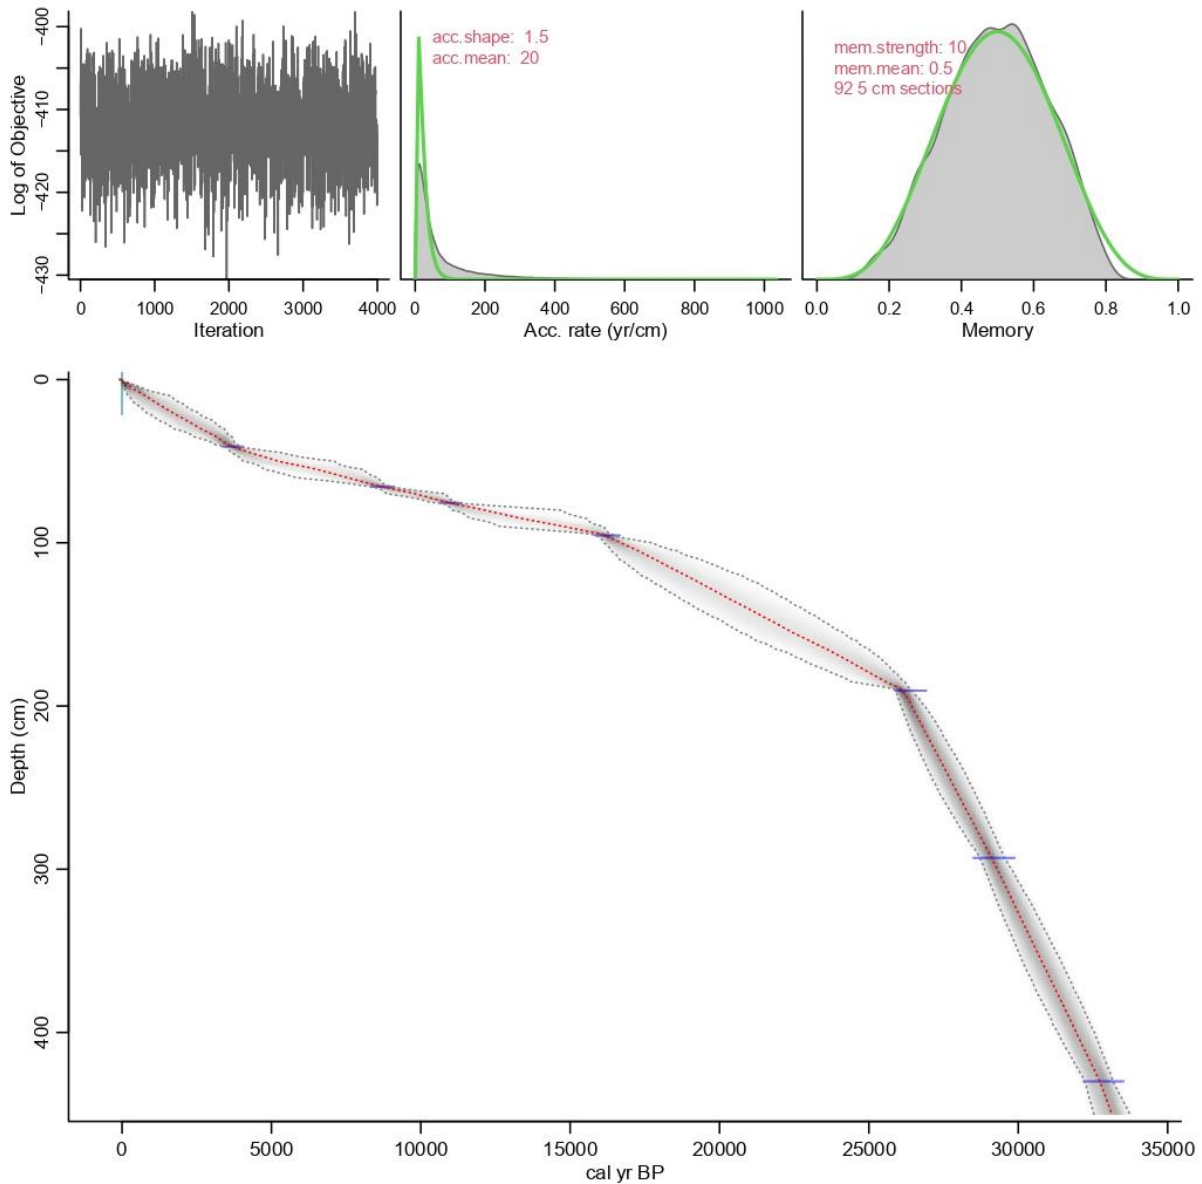

54

55 **Fig S1: Age-Depth Model for Sediment Core MGS17/GC02.** The Bacon age-depth model  
56 (Blaauw and Christen, 2011) for the sediment core from CWBoB is constructed using 7  
57 radiocarbon ages obtained from mixed planktonic foraminifera species *G. ruber* and *G.*  
58 *sacculifer*. The core top is assumed to represent the present day. The gray dotted lines indicate  
59 the 95% confidence intervals, while the red dotted line represents the best fit ages, determined  
60 by the weighted mean age for each depth interval. The radiocarbon data and Bacon model  
61 output are provided in Table S1.

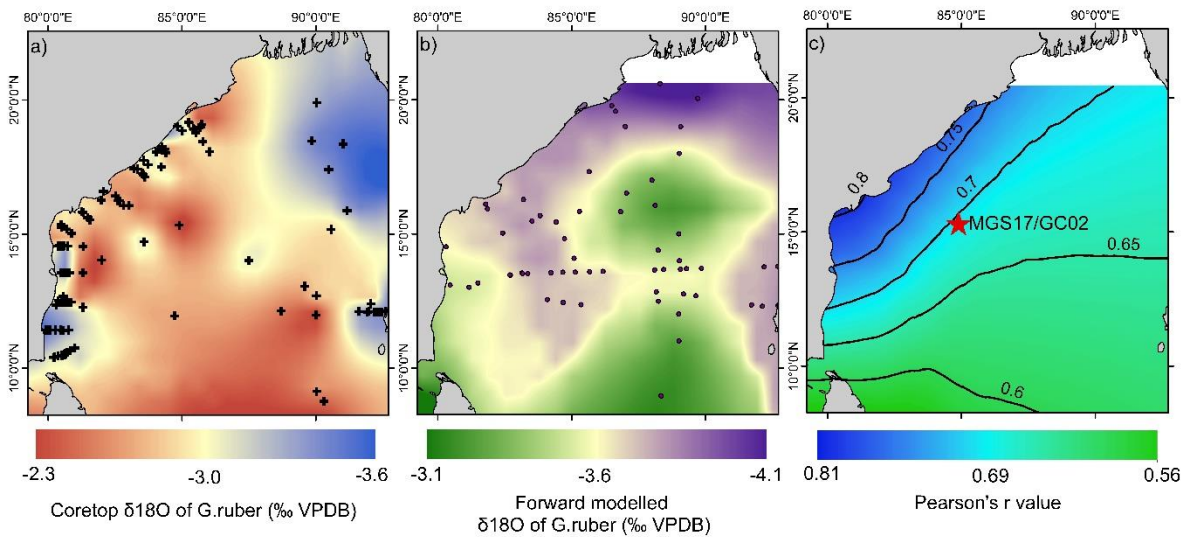

63

64 **Fig. S2: Comparison between core-top  $\delta^{18}\text{O}$  values of *G. ruber* and forward-modeled**

65 **based estimates of  $\delta^{18}\text{O}$  in *G. ruber*:** a) Spatial mapping of core-top (0-1 cm; locations  
 66 highlighted with a plus symbol)  $\delta^{18}\text{O}$  values in *G.ruber* (refer to Table S4) interpolated  
 67 by using the kriging interpolation method; b) For forward modelling,  $\delta^{18}\text{O}$  in seawater  
 68 from the BoB region are collated (refer to Table S2; locations highlighted with purple  
 69 dots), together with the average SST data from MERRA-2 reanalysis (1980-2023)  
 70 (Global Modeling and Assimilation Office, n.d.) during the South Asian Summer  
 71 Monsoon (SASM) period (June to September) is used for deducing the carbonate  $\delta^{18}\text{O}$   
 72 values. These SST and  $\delta^{18}\text{O}$  seawater values are input parameters for the estimation of  
 73  $\delta^{18}\text{O}$  values in *G. ruber* (Mulitza et al., 2003) at equilibrium and interpolated using the  
 74 Kriging interpolation technique. c) A geographically weighted regression method  
 75 (Mitchell, 2005) is used for the estimation of Pearson's correlation coefficient (r-value)  
 76 between observed core-top  $\delta^{18}\text{O}$  values in *G. ruber* and predicted  $\delta^{18}\text{O}$  values in  
 77 *ruber* using a forward-modelling approach.

78

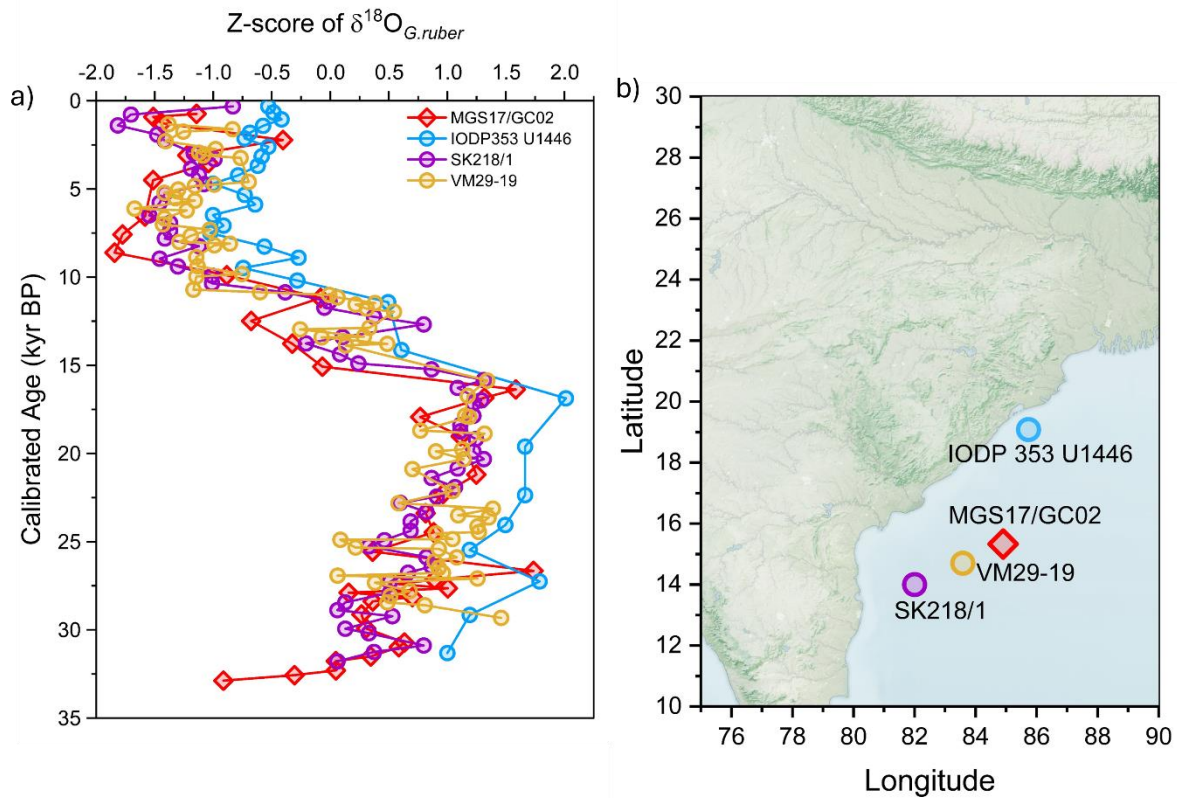

79

80 **Fig. S3: Spatio-temporal comparison of  $\delta^{18}\text{O}$  variability in *G. ruber* across sites over BoB.**

81 a) Time series comparison of Z-scores of  $\delta^{18}\text{O}$  in *G. ruber* from the present study site  
 82 (MGS17/GC02) with available records from adjacent sites VM29-19(Rashid et al.,  
 83 2011), SK218/1(Govil and Divakar Naidu, 2011), and IODP Expedition 353 Site  
 84 U1446(Clemens et al., 2021). b) Panel displaying the locations of these sites. The  
 85 pattern observed shows the regional heterogeneity in sea surface temperature and  
 86 salinity which governs the  $\delta^{18}\text{O}$  measured in shell carbonate.

87

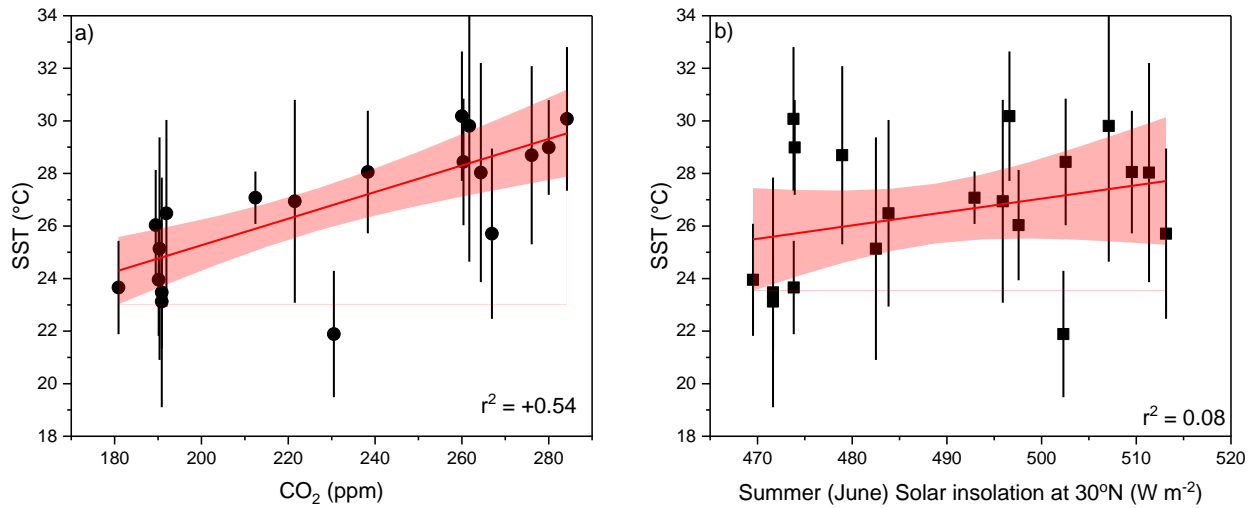

88

89 **Fig. S4:** Sensitivity analysis of estimated SST (1.6 kyr resolution) with climate forcing (a)  
 90 mean atmospheric CO<sub>2</sub> record from Antarctic ice core (Bereiter et al., 2015) and (b)  
 91 expected mean summer (June) time solar insolation at 30°N (Berger, 1992), during past  
 92 31 kiloyears BP.

93

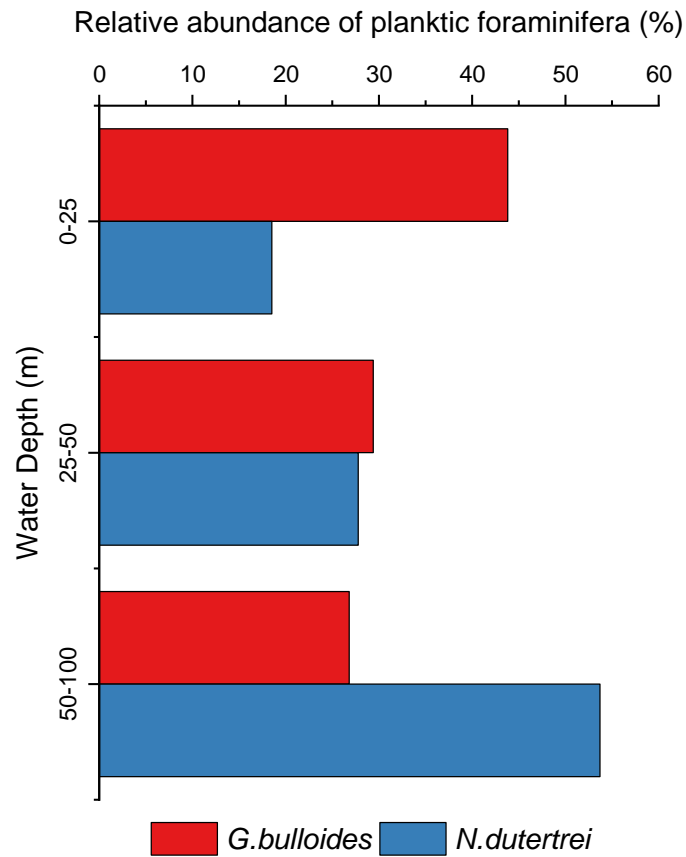

94

95 **Fig. S5: Depth-wise preferred habitat of *G. bulloides* and *N. dutertrei* in sites over**  
 96 **Northern Indian Ocean.** The relative abundance is based on plankton net samples collected  
 97 at depths of 0-25m, 25-50m, and 50-100m in the coastal waters of Sumatra (Latitude: 1°N to  
 98 6°S; Longitude: 96°E to 103°E) (Tapia et al., 2022). Here, we presented data for a 100m water  
 99 depth.

100

101



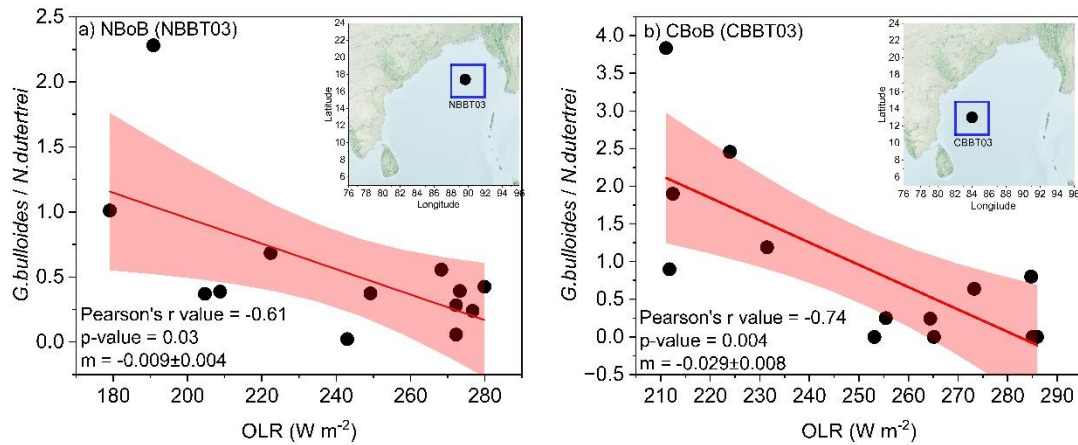

102

103 **Fig. S6: Relationship between the *G. bulloides* to *N. dutertrei* ratio and cloud cover index**

104 **deduced from Outgoing Longwave Radiation (OLR) over the BoB. (a) We**

105 presented sediment trap data from NBBT03, located in the NBoB, which was

106 programmed to collect 13 successive samples, each spanning a duration of 27 days,

107 between November 16, 1988, and October 6, 1989. Planktic foraminiferal counts were

108 conducted on samples collected at 2 depths, 967m and 1498m, with a size fraction

109 ranging between 150 $\mu$ m to 500 $\mu$ m(Guptha et al., 1997). (b) Sediment trap CBBT03

110 was deployed over the region CWBoB, which was operational and coinciding with

111 NBBT03. Planktic foraminiferal counts were conducted on samples collected from one

112 depth at 950m(Guptha et al., 1997). Interpolated monthly OLR values were obtained

113 for both sites for the period of observations at NBBT03 and CBBT03, and a 4 $^{\circ}$ x4 $^{\circ}$  grid

114 was designed with each site as the focal point (Liebmann and Smith, 1996).

115

116 **Title for the supplementary table:**

117 **Table S1:** Radiocarbon Data and Bacon Age-Model Output

118 **Table S2:**  $\delta^{18}\text{O}$  of seawater record over the Bay of Bengal during SASM (JJAS).

119 **Table S3:** Estimation of  $\delta^{18}\text{O}$  of freshwater input to the Bay of Bengal.

120 **Table S4:** Raw Values and Corrections for clumped and stable isotope analysis, Temperature  
121 estimation, stable oxygen isotope of seawater estimation, and error propagation.

122 **Table S5:** Calculation of  $\Delta\text{SSS}$  between NBoB and CWBoB.

123

124 **Reference:**

- 125 Bereiter, B., Eggleston, S., Schmitt, J., Nehrbass-Ahles, C., Stocker, T.F., Fischer, H.,  
126 Kipfstuhl, S., Chappellaz, J., 2015. Revision of the EPICA Dome C CO<sub>2</sub> record from  
127 800 to 600-kyr before present. *Geophys. Res. Lett.* 42, 542–549.  
128 <https://doi.org/10.1002/2014GL061957>
- 129 Berger, A., 1992. *Orbital Variations and Insolation Database*. NOAA/NGDC  
130 Paleoclimatology Program, Boulder CO, USA.
- 131 Blaauw, M., Christen, J.A., 2011. Flexible paleoclimate age-depth models using an  
132 autoregressive gamma process. *Bayesian Anal.* 6, 457–474. [https://doi.org/10.1214/11-](https://doi.org/10.1214/11-ba618)  
133 [ba618](https://doi.org/10.1214/11-ba618)
- 134 Clemens, S.C., Yamamoto, M., Thirumalai, K., Giosan, L., Richey, J.N., Nilsson-Kerr, K.,  
135 Rosenthal, Y., Anand, P., McGrath, S.M., 2021. Remote and local drivers of pleistocene  
136 South Asian summer monsoon precipitation: A test for future predictions. *Sci. Adv.* 7,  
137 1–16. <https://doi.org/10.1126/sciadv.abg3848>
- 138 Global Modeling and Assimilation Office, n.d. MERRA-2 tavgM\_2d\_ocn\_Nx: 2d,Monthly  
139 mean,Time-Averaged,Single-Level,Assimilation,Ocean Surface Diagnostics V5.12.4,  
140 Greenbelt, MD, USA, Goddard Earth Sciences Data and Information Services Center  
141 (GES DISC), Accessed:27/04/2024.  
142 <https://doi.org/https://doi.org/10.5067/4IASLIDL8EEC>
- 143 Govil, P., Divakar Naidu, P., 2011. Variations of Indian monsoon precipitation during the last  
144 32kyr reflected in the surface hydrography of the Western Bay of Bengal. *Quat. Sci.*  
145 *Rev.* 30, 3871–3879. <https://doi.org/10.1016/j.quascirev.2011.10.004>
- 146 Gupta, M.V.S., Curry, W.B., Ittekkot, V., Muralinath, A.S., 1997. Seasonal variation in the  
147 flux of planktic Foraminifera; sediment trap results from the Bay of Bengal, northern

148 Indian Ocean. *J. Foraminifer. Res.* <https://doi.org/10.2113/gsjfr.27.1.5>

149 Liebmann, Smith, 1996. NOAA Interpolated Outgoing Longwave Radiation (OLR) data  
150 provided by the NOAA PSL, Boulder, Colorado, USA, from their website at  
151 <https://psl.noaa.gov>. *Bull. Am. Meteorol.* 77, 1275–1277.

152 Mitchell, A., 2005. *The ESRI Guide to GIS Analysis. Volume 2.* ESRI press.

153 Mulitza, S., Boltovskoy, D., Donner, B., Meggers, H., Paul, A., Wefer, G., 2003.  
154 Temperature:  $\delta^{18}\text{O}$  relationships of planktonic foraminifera collected from surface  
155 waters. *Palaeogeogr. Palaeoclimatol. Palaeoecol.* [https://doi.org/10.1016/S0031-](https://doi.org/10.1016/S0031-0182(03)00633-3)  
156 [0182\(03\)00633-3](https://doi.org/10.1016/S0031-0182(03)00633-3)

157 Rashid, H., England, E., Thompson, L., Polyak, L., 2011. Late glacial to holocene indian  
158 summer monsoon variability based upon sediment records taken from the bay of Bengal.  
159 *Terr. Atmos. Ocean. Sci.* [https://doi.org/10.3319/TAO.2010.09.17.02\(TibXS\)](https://doi.org/10.3319/TAO.2010.09.17.02(TibXS))

160 Tapia, R., Ho, S.L., Wang, H.Y., Groeneveld, J., Mohtadi, M., 2022. Contrasting vertical  
161 distributions of recent planktic foraminifera off Indonesia during the southeast monsoon:  
162 implications for paleoceanographic reconstructions. *Biogeosciences* 19, 3185–3208.  
163 <https://doi.org/10.5194/bg-19-3185-2022>

164
